1 **Title**

2 Selection for antibiotic resistance is reduced when embedded in a natural microbial  
3 community

4 **Author list**

5 Uli Klümper<sup>1,2,\*</sup>, Mario Recker<sup>3</sup>, Lihong Zhang<sup>2</sup>, Xiaole Yin<sup>4</sup>, Tong Zhang<sup>4</sup>, Angus Buckling<sup>1</sup>,  
6 William Gaze<sup>2</sup>

7 <sup>1</sup> CLES & ESI, University of Exeter, Penryn, Cornwall, United Kingdom

8 <sup>2</sup> European Centre for Environment and Human Health, University of Exeter Medical School,  
9 ESI, Penryn, Cornwall, United Kingdom

10 <sup>3</sup> College of Engineering, Mathematics and Physical Sciences, University of Exeter, Penryn,  
11 Cornwall, United Kingdom

12 <sup>4</sup> Department of Civil Engineering, University of Hong Kong, Hong Kong, China

13

14 \*corresponding author:

15 Uli Klümper

16 CLES & ESI University of Exeter

17 TR109FE Penryn

18 United Kingdom

19 Email: [u.klumper@exeter.ac.uk](mailto:u.klumper@exeter.ac.uk)

20 Phone: (+44)7497497338

21 ORCID: 0000-0002-4169-6548

## 22 **Abstract**

23 Antibiotic resistance has emerged as one of the most pressing, global threats to public  
24 health. In single-species experiments selection for antibiotic resistance occurs at very low  
25 antibiotic concentrations. However, it is unclear how far these findings can be extrapolated to  
26 natural environments, where species are embedded within complex communities. We  
27 competed isogenic strains of *Escherichia coli*, differing exclusively in a single chromosomal  
28 resistance determinant, in the presence and absence of a pig fecal microbial community  
29 across a gradient of antibiotic concentration for two relevant antibiotics: gentamicin and  
30 kanamycin. We show that the minimal selective concentration was increased by more than  
31 one order of magnitude for both antibiotics when embedded in the community. We identified  
32 two general mechanisms were responsible for the increase in minimal selective  
33 concentration: an increase in the cost of resistance and a protective effect of the community  
34 for the susceptible phenotype. These findings have implications for our understanding of the  
35 evolution and selection of antibiotic resistance, and can inform future risk assessment efforts  
36 on antibiotic concentrations.

## 37 **Introduction**

38 The emergence and spread of antimicrobial resistance (AMR) genes in bacterial pathogens  
39 has been identified as one of the major threats to human health by the World Health  
40 Organisation (WHO, 2014). Whilst AMR genes have been detected in ancient permafrost  
41 samples (D'Costa et al., 2011), anthropogenic use of antibiotics has caused a rapid increase  
42 in their prevalence (Knapp et al., 2010). A large body of theory and *in vitro* work has  
43 identified the role of ecological context, such as treatment regime and environmental  
44 heterogeneity, in AMR gene dynamics (Drlica, 2003; Drlica and Zhao, 2007; Gullberg et al.,  
45 2014, 2011). However, the majority of this work has not explicitly considered a crucial  
46 feature of microbial ecology: microbes are typically embedded within complex communities  
47 of interacting species. This is always the case within human and livestock microbiomes, in  
48 which antibiotic-imposed selection is likely to be particularly strong (Carlet, 2012). Here, we  
49 combine experiments and theory to determine how selection for AMR is influenced by the  
50 presence of other species derived from a natural gut microbial community. The focus of this  
51 study is selection for pre-existing resistance genes within a focal species, rather than  
52 selection on *de novo* variation arising through spontaneous mutations or acquired through  
53 horizontal gene transfer from another species.

54 Recent experimental studies suggest that selection for AMR genes in complex communities  
55 is occurring at antibiotic concentrations (the minimum selective concentration; MSC) that are  
56 much lower than those that prevent the growth of susceptible bacteria (minimum inhibitory  
57 concentration; MIC) (Lundström et al., 2016; Murray et al., 2018); as has been previously  
58 shown within single species *in vitro* (Gullberg et al., 2014, 2011; Liu et al., 2011). However, it  
59 is unclear how the presence of other microbial species affects the MSC. While the precise  
60 effect of other species is likely context-dependent, we hypothesise that the presence of the  
61 community will typically increase the MSC. Studies of single species suggest that resistant  
62 cells can afford protection to susceptible ones, through both, intracellular and extracellular  
63 degradation of antibiotics (Medaney et al., 2016; Sorg et al., 2016; Yurtsev et al., 2013), thus

64 increasing relative fitness of susceptible strains and hence the MSC. However, excreted  
65 metabolites can both potentiate or decrease antibiotic efficacy, thus decreasing or increasing  
66 MSCs (Cao et al., 2012; Churski et al., 2012). Further, any costs associated with AMR may  
67 be enhanced by increased competition for resources, as, for example, has been observed  
68 with respect to resistance in flies to parasitoids (Kraaijeveld et al., 2001) and bacteria to  
69 viruses (Gómez and Buckling, 2011).

70 To explore the potential effects of community context on AMR selection, we competed  
71 isogenic *Escherichia coli* MG1655 strains, differing exclusively in a single chromosomal  
72 resistance determinant, in the presence and absence of a microbial community across a  
73 gradient of two different aminoglycoside antibiotics, kanamycin and gentamicin. We  
74 embedded the *E. coli*, commonly found in the anaerobic digestive tract of warm-blooded  
75 mammals (Tenaillon et al., 2010), within a pig faecal community in experimental anaerobic  
76 digesters in an attempt to partially mimic a gut environment. We additionally employed  
77 metagenomic analysis, community typing (16S) and mathematical modelling to provide  
78 insights into mechanisms underpinning community effects on AMR selection.

## 79 **Results**

### 80 **Community context affects selection for gentamicin resistance**

81 Isogenic strains of the focal species *E. coli*, with and without gentamicin resistance, were  
82 competed in the presence and absence of a pig faecal community across a 5 orders of  
83 magnitude gradient of gentamicin concentrations. Independent of antibiotic concentration the  
84 focal species increased in abundance during the 3 day evolution experiment from ~10% at  
85 inoculation to above 90% relative abundance based on 16S sequencing (Fig S1A&B). Both  
86 resistant and sensitive strains showed positive growth across the whole range of  
87 concentrations and both treatments with cell counts increasing by 2.25 to 3.96 orders of  
88 magnitude per day (Fig 1A).

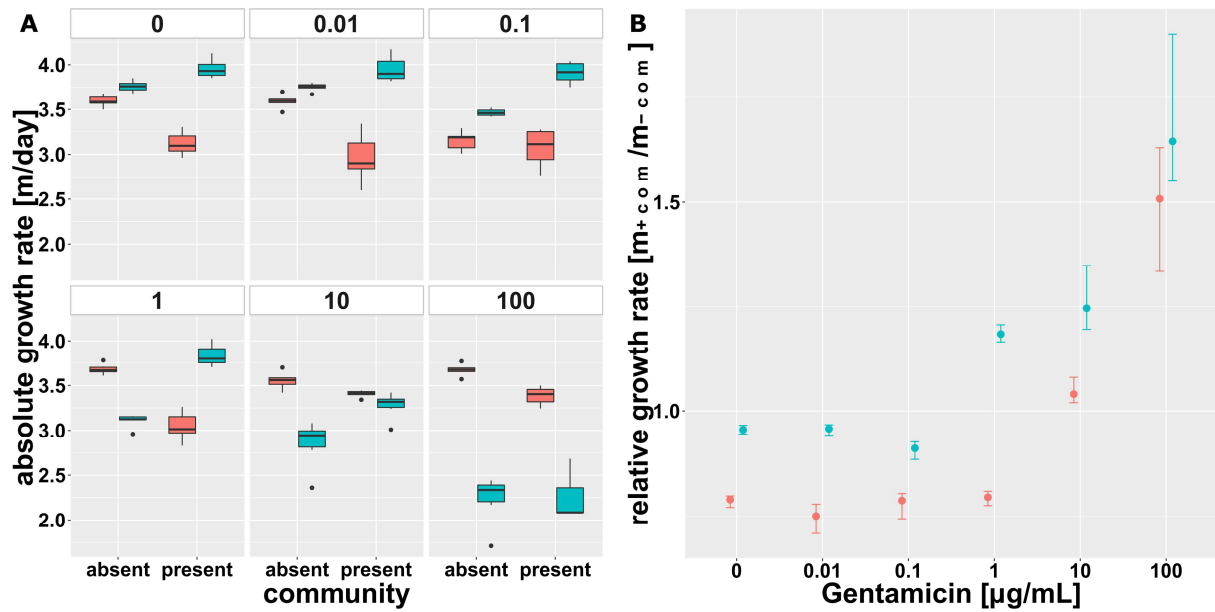

89

90 **Fig 1. Malthusian growth parameter per day of the focal species' isogenic strains for gentamicin.**

91 Values are displayed across the antibiotic gradient and in absence and presence of the gut microbial community.  
92 (A) Average ( $\pm$ SD,  $n=6$ ) logarithmic absolute growth per day for the resistant (red) and the susceptible (blue)  
93 strain. Note: A different inoculum size of the focal species in absence ( $\sim 10^6$  bacteria) and presence ( $\sim 10^5$   
94 bacteria = 10% of total inoculum) of the community was used. (B) Ratio of absolute Malthusian growth  
95 parameters (with 95% confidence intervals based on 1000-fold bootstrap analysis) in presence and absence of  
96 the microbial community across the gradient of antibiotic concentrations.

97

98 There was a small competitive fitness cost (t-test against 1,  $p=0.0005$ ) of gentamicin  
99 resistance in the absence of the community ( $\rho_r = 0.955 \pm 0.014$ , mean  $\pm$  SD), and this cost  
100 appeared to be greatly increased when the community was present (Fig 1B, 2) ( $\rho_r = 0.788 \pm$   
101 0.016) (ANOVA corrected for multiple testing,  $p<0.01$ ,  $F=360.36$ ). As antibiotic concentration  
102 increased, this cost was offset by the benefit of resistance. However, the reduction in fitness  
103 of the resistant strain in the presence of the community remained fairly constant (significant  
104 differences,  $p<0.05$  after controlling for multiple testing at concentrations between 0 and 10  
105  $\mu\text{g/mL}$ ) up to 100  $\mu\text{g/mL}$  gentamicin, at which point the community had no effect on relative  
106 fitness (ANOVA corrected for multiple testing,  $p=0.259$ ,  $F=1.42$ ).

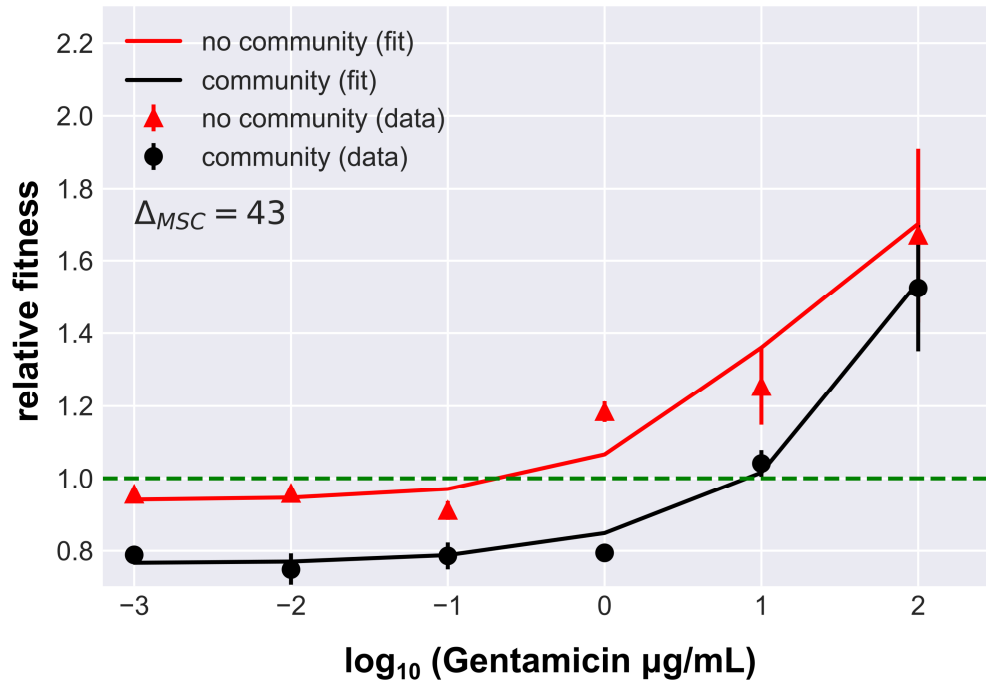

107

108 **Fig 2. Relative fitness of the gentamicin resistant strain**

109 Values (mean  $\pm$  SD, n=6) in presence (black) and absence (red) of the community. Solid lines represent the best  
 110 fit fitness curve through the mathematical model based on parameter estimates presented in Table 1. The  
 111 dashed line indicates neutral selection at a relative fitness of  $\rho_r = 1$ , where the intercept with the fitness curve  
 112 indicates the minimal selective concentration.

113

| Gentamicin     |        |             |           |           |
|----------------|--------|-------------|-----------|-----------|
| parameter      | all    | susceptible | resistant | community |
| $\phi$         |        | 1.4         | 1.3       | 1.3       |
| $e_{ij}$       |        | 1           | 2.3       | 3         |
| $\alpha_{i,0}$ |        | 1.3         | 2.9       | 1.6       |
| $\beta_{i,0}$  |        | 0.7         | 0.8       | 0.6       |
| $k_d$          | $10^5$ | -           | -         | -         |
| $f_{\max}$     | 0.9    | -           | -         | -         |

114 **Table 1: Model parameter values for gentamicin fitness curves.**

115

116 *Community composition is altered across the gentamicin gradient*

117 It is possible that changes in community composition across the antibiotic gradient may have  
 118 contributed to the observed changes in selection for resistance caused by the community,  
 119 notably between 10 and 100  $\mu\text{g/mL}$ . The composition of the microbial community changed  
 120 significantly from the collected faecal sample, to inoculum and further during the duration of

121 the experiment (AMOVA,  $p < 0.001$ , Fig S2A). Above 1  $\mu\text{g/mL}$  gentamicin the previously  
122 dominant Proteobacteria were outcompeted by Firmicutes (Fig S2B) leading to a significant  
123 (AMOVA,  $p < 0.01$ ) separation of communities below and above this threshold concentration  
124 in the NMDS plot (Fig S2B). However, there was no significant change in composition  
125 between 10 and 100  $\mu\text{g/mL}$ , suggesting that compositional changes did not play a major role  
126 in community-imposed selection.

127

### 128 *Community context imposes a cost of resistance*

129 To test the hypotheses derived from the numerical data we used numerical simulations of  
130 our experimental set up to determine the likely mechanisms underpinning the observed  
131 population dynamics in a common logarithmic growth model. We determined models based  
132 on the key empirical findings in the absence of the community (specifically, that there is a  
133 cost of resistance in the absence of antibiotics, and that antibiotics inhibit the growth of the  
134 sensitive strain in a dose dependent manner), and then determined the most parsimonious  
135 way in which the community could have altered the relative fitness of the resistant and  
136 susceptible strains (Table 1). We found a good fit to the data simply by assuming that the  
137 community imposed a greater competitive effect, constant across the antibiotic gradient, on  
138 the resistant rather than the sensitive strain ( $e_{rj} \gg e_{cj} > e_{sj}$ , where  $e_{ij}$  is the competition  
139 coefficient imposed on the focal population (resistant  $r$ , susceptible  $s$  and community  $c$ ) by  
140 the community). Note that the lack of effect of the community at high antibiotic  
141 concentrations (100  $\mu\text{g/mL}$ ) was caused by there being very little growth of the susceptible  
142 strain, and hence relative fitness was determined primarily by the growth of the resistant  
143 strain.

144 The numerical simulation allowed us to estimate the change in MSC from absence to  
145 presence of the community by deterministically evaluating the concentration at the intercept

146 with neutral selection at a relative fitness of  $\rho_r = 1$ . We estimated a 43-fold increase in MSC  
147 in the presence of the community (Fig 2).

148

### 149 Community context affects selection for kanamycin resistance

150 As with gentamicin, the focal species increased in abundance during the 3 day competition  
151 experiment from ~10% at inoculation to above 90% relative abundance (Fig S1C&D). Again,  
152 both strains increased in abundance across both treatments and all concentrations of the 5  
153 orders of magnitude antibiotic gradient with cell numbers increasing by 1.45 to 3.09 orders of  
154 magnitude per day (Fig 3A). In the absence of this community, kanamycin resistance also  
155 imposed a slight metabolic fitness cost on the resistant strain ( $\rho_r = 0.915 \pm 0.036$ ) (Fig 3B).

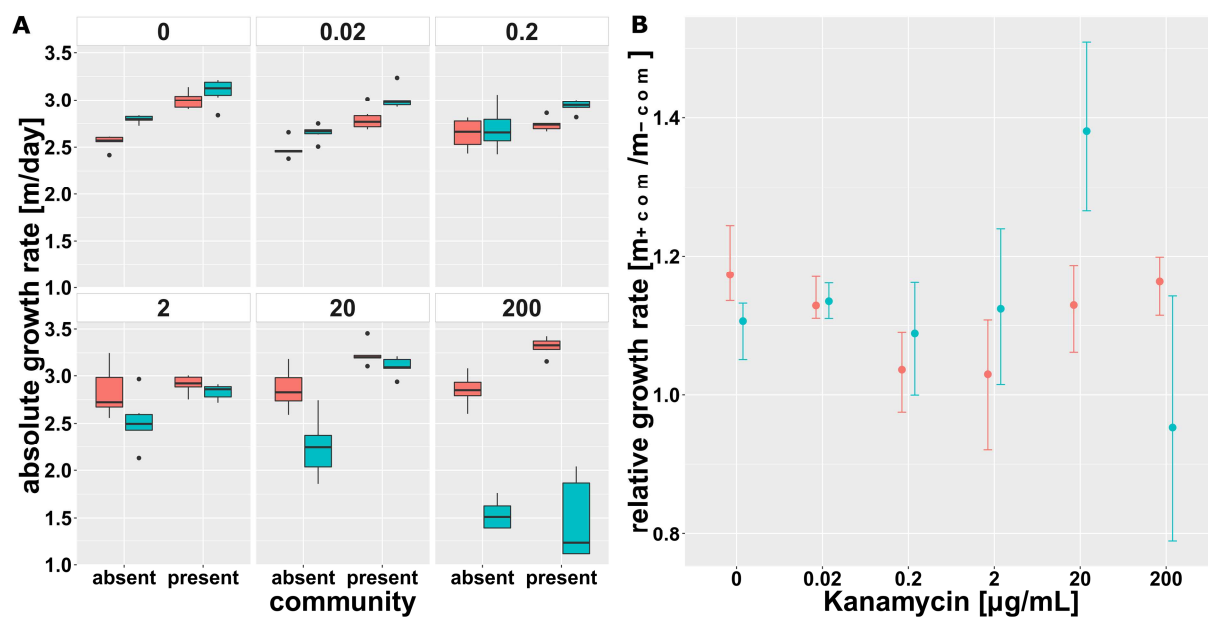

156

157 **Fig 3. Malthusian growth parameter per day of the focal species' isogenic strains for kanamycin.**

158 Values are displayed across the antibiotic gradient and in absence and presence of the gut microbial community.  
159 (A) Average ( $\pm$ SD, n=6) logarithmic absolute growth per day for the resistant (red) and the susceptible (blue)  
160 strain. Note: A different inoculum size of the focal species in absence ( $\sim 10^6$  bacteria) and presence ( $\sim 10^5$   
161 bacteria = 10% of total inoculum) of the community was used. (B) Ratio of absolute Malthusian growth  
162 parameters (with 95% confidence intervals based on 1000-fold bootstrap analysis) in presence and absence of  
163 the microbial community across the gradient of antibiotic concentrations.

164

165 However, unlike gentamicin, the community did not increase the general cost of resistance.

166 Indeed, the community had no significant effect on the relative fitness of the resistant strain



167 except at a concentration of 20 $\mu$ g/mL (ANOVA corrected for multiple testing,  $p=0.002$ ,  
168  $F=15.58$ ) (Fig 4). There was a clear fitness advantage for the resistant strain in the absence  
169 of the community at this concentration ( $\rho_r = 1.288 \pm 0.149$ ; t-test against 1,  $p=0.0052$ ), while  
170 in the presence of the community this difference in relative fitness while still significant (t-test  
171 against 1,  $p=0.0088$ ) was considerably lower ( $\rho_r = 1.034 \pm 0.020$ ). At 200  $\mu$ g/mL kanamycin,  
172 close to the susceptible strains MIC, the resistant strain had an equally high relative fitness  
173 regardless of the presence of the community (ANOVA corrected for multiple testing,  
174  $p=0.079$ ,  $F=3.84$ ).

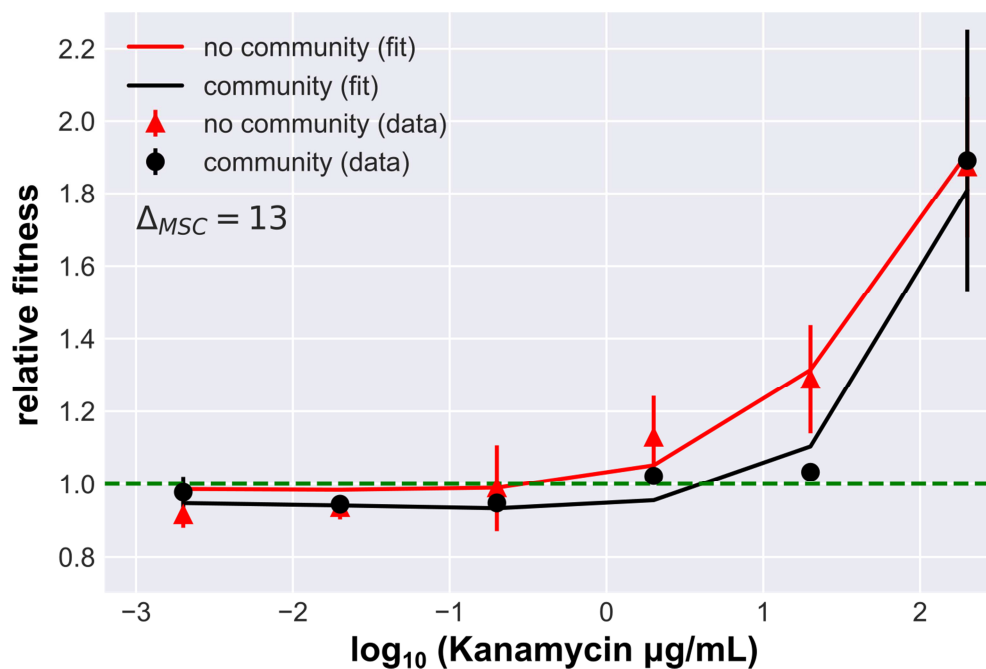

175  
176 **Fig 4. Relative fitness of the kanamycin resistant strain**

177 Values (mean  $\pm$  SD,  $n=6$ ) in presence (black) and absence (red) of the community. Solid lines represent the best  
178 fit fitness curve through the mathematical model based on parameter estimates presented in Table 2. The  
179 dashed line indicates neutral selection at a relative fitness of  $\rho_r = 1$ , where the intercept with the fitness curve  
180 indicates the minimal selective concentration.

181

| Kanamycin      |        |             |           |           |
|----------------|--------|-------------|-----------|-----------|
| parameter      | all    | susceptible | resistant | community |
| $\varphi$      | -      | 1.9         | 1.8       | 1.3       |
| $e_{ij}$       | -      | 1.7         | 1.3       | 1.6       |
| $\alpha_{i,0}$ | -      | 1.0         | 1.4       | 1.6       |
| $\beta_{i,0}$  | -      | 0.6         | 0.4       | 0.5       |
| $k_d$          | $10^5$ | -           | -         | -         |
| $f_{max}$      | 0.9    | -           | -         | -         |

182 **Table 2. Model parameter values for kanamycin selection curve.**

183

184 *Community and antibiotic resistance composition remain stable across the kanamycin*  
 185 *gradient*

186 As with the gentamicin experiment, a significantly shift in community composition from  
 187 collected faecal sample, to inoculum and further during the duration of the kanamycin  
 188 experiment (AMOVA,  $p < 0.001$ , Fig S3A) was observed. However, across the whole gradient  
 189 of antibiotics, Firmicutes (Fig S3B) remained the dominant phylum with no significant  
 190 changes in community composition as a result. As such, compositional changes again  
 191 cannot explain the impact of the community on focal strain fitness under selection at 20  
 192  $\mu\text{g/mL}$  only. We additionally carried out metagenomic analysis for the 0, 2 and 20  $\mu\text{g/mL}$   
 193 kanamycin treatments to determine whether relative abundance of resistance genes had  
 194 changed within the community, despite the fact that there were no changes in community  
 195 composition. Resistance to aminoglycoside (ANOVA,  $p = 0.04$ ) and other classes of  
 196 antibiotics (fosmidomycin, kasugamycin, macrolides, polymyxin and tetracycline (ANOVA, all  
 197  $p < 0.01$ )) significantly increased in the community of all reactors compared to the original  
 198 faecal community independent of antibiotic concentrations (Fig 5A). However, there was no  
 199 significant difference between kanamycin concentration and the abundance (ANOVA,  
 200  $p = 0.15$ ) of aminoglycoside resistance in general (Fig 5A) or any specific aminoglycoside  
 201 resistance subtypes (Fig 5B) suggesting that relative fitness of the focal species was not  
 202 influenced by the community resistome. Unsurprisingly, since no antibiotic concentration

203 dependent selection for aminoglycoside resistance was observed within the community, no  
 204 significant co-selection for resistance to any other classes of antibiotics was observed either.

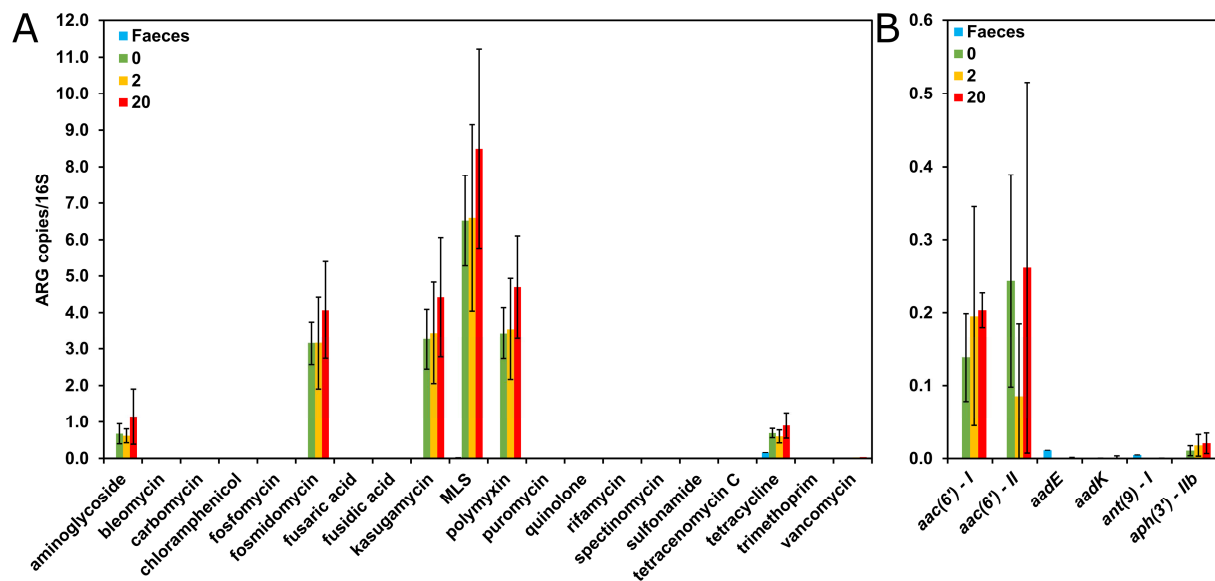

205

206 **Fig 5. Detected resistance genes.**

207 Type (A) and aminoglycoside subtype (B) relative abundance (resistance gene number normalized with 16S  
 208 rRNA copy number), in original faecal community and in final reactor community at 3 kanamycin concentrations  
 209 (mean  $\pm$  SD;  $n_{\text{faeces}}=2$ ,  $n_{K_{n0}}=6$ ,  $n_{K_{n2}}=6$ ,  $n_{K_{n20}}=5$ ). Only genes detected with the ARGs-OAP pipeline are shown. MLS  
 210 = Macrolides, Lincosamides, Streptogramins

211

212 *Presence of the community can enhance growth of susceptible E. coli population at*  
 213 *intermediate antibiotic concentrations*

214 Numerical simulations showed that, unlike for gentamicin resistance, a community-imposed  
 215 increase in the cost of kanamycin resistance was unable to explain why the benefit to the  
 216 drug resistant focal *E. coli* strain was reduced in the presence of the community at  
 217 intermediate drug concentrations ( $e_{ij} = e_s$ ). This suggested different interactions between *E.*  
 218 *coli* and the rest of the community, and we speculated that the community might have  
 219 provided a protective effect against kanamycin for the susceptible *E. coli*. Growth data  
 220 demonstrated this to be the case: the presence of the community decreased or had no  
 221 significant impact on the growth rate of either the susceptible or resistant *E. coli*, except at  
 222 20  $\mu\text{g/mL}$  where the growth rate of the susceptible, but not the resistant strain, was  
 223 significantly increased by the presence of the community (Fig 3B). We investigated if a

224 protective effect of the community was sufficient to explain the observed data by fitting  
225 numerical simulations where the dose-response parameters  $\alpha_{s,r}$  and  $\beta_{s,r}$  were explicitly  
226 dependent on the (time-dependent) density of the community (as listed in Table 2). The  
227 resulting model provided a good fit to the experimental data, suggesting that community  
228 protection was driving the observed population dynamics with a 12-fold increase in MSC.

229

## 230 **Discussion**

231 In this study we investigated how being embedded within a semi-natural community (a pig  
232 gut derived community in an anaerobic digester) affects selection for AMR within a focal  
233 species (*E. coli*). For two antibiotics commonly fed to agricultural animals (gentamicin and  
234 kanamycin), we find the presence of the community selects against resistance, resulting in  
235 1-2 orders of magnitude higher minimal selective concentrations for antibiotic resistance.  
236 This suggests that recent *in vitro* single strain based estimates of MSCs (Gullberg et al.,  
237 2014, 2011; Liu et al., 2011) are likely much lower than would be observed *in vivo* and might  
238 explain why in certain ecosystems no selection for antibiotic resistance was observed in  
239 focal strains (Flach et al., 2018).

240 The primary mechanisms responsible for this community-imposed reduction in selection for  
241 resistance differed for the two tested drugs, yet are likely fairly general based on their  
242 ecological origin. For gentamicin, the community increased the fitness costs reflected by  
243 reduced growth rates that are associated with resistance in the absence of antibiotics. These  
244 elevated costs were retained at similar levels across the antibiotic gradient, up until doses  
245 were so high that only the resistant strain grew (similar behaviour above a certain threshold  
246 concentration has previously been described for single strain systems (Andersson and  
247 Hughes, 2011, 2010) and our results show that this holds true in a community context).  
248 Resource limitation – directly manipulated or through competition - has been found to  
249 increase costs against a range of stressors in a range of organism, from resistance of

250 plasmodium to antimalarial drugs (Wale et al., 2017) to phage resistance in bacteria (Gómez  
251 and Buckling, 2011). This is presumably because resource limitation has a more pronounced  
252 effect on resistant genotypes (Song et al., 2014).

253 For kanamycin, community-imposed selection against resistance was only apparent at  
254 intermediate antibiotic concentrations. The absolute growth rate of the susceptible strain was  
255 significantly increased at intermediate concentrations in presence of the community. Our  
256 model fitting suggests this is because of a protective effect of the community. The protective  
257 effect might have only been observed at intermediate concentrations since low  
258 concentrations were insufficient to detectably lower the relative fitness of the susceptible  
259 strain, while at high concentrations the protective effect was too small to be detectable. Such  
260 protective effects have been reported extensively within-species (Medaney et al., 2016;  
261 Yurtsev et al., 2013), as well as more recently within more complex communities (Sorg et al.,  
262 2016), either because of extra- or intracellular modification of antibiotics. Other common  
263 mechanisms known to increase a strains resistance to antibiotics in communities involve  
264 flocculation (Kümmerer, 2009) or biofilm formation (Drenkard and Ausubel, 2002; Mah et al.,  
265 2003), but might here only play a minor role due to the shaking conditions.

266 The mechanisms discussed above all underlie the selection for standing variation in pre-  
267 existing resistance genes, rather than selection on *de novo* variation arising through  
268 spontaneous mutations or horizontal gene transfer from other species. For *de novo*  
269 chromosomal mutations, the community is likely to further limit the spread of resistance,  
270 because the reduced population sizes of the focal strains in the presence of the community  
271 increases the chance that more costly mutations will be fixed (Perron et al., 2007). In  
272 contrast, being embed in a community might enhance the spread of resistance. First, there  
273 will be a greater source of resistance genes available to the focal species. Second, selection  
274 against resistance acquired through horizontal gene transfer at low antibiotic concentrations  
275 might follow different dynamics. While chromosomal resistance might be outcompeted and  
276 subsequently lost, resistance genes embedded on conjugative plasmids can persist or even

277 increase in abundance, as a consequence of their sometimes extremely broad host ranges  
278 and high transfer frequencies (Arias-Andres et al., 2018; Klümper et al., 2017, 2015;  
279 Musovic et al., 2014; Shintani et al., 2014). In controlled single strain experiments plasmid  
280 born resistance proved more costly than chromosomal resistance (Gullberg et al., 2014).  
281 However, in more complex scenarios selection for mobile genetic element borne resistance  
282 usually depends not only on the single acquired resistance gene, but a combination of other  
283 linked traits encoded by the MGE as part of the communal gene pool (Norman et al., 2009).  
284 Thus, difficulties in making general predictions on the selection dynamics of horizontally  
285 acquired resistance in microbial communities arise that merit future research efforts.

286 In summary, we show that selection for antimicrobial resistance was influenced by being  
287 embed in a “natural” microbial community, such that the MSC was increased by more than  
288 one order of magnitude for two different antibiotics. Further to reducing relative fitness of  
289 resistance, being embedded in a community would also reduce absolute fitness, which has  
290 been argued to sometime be the major driver of spread of resistance (Day et al., 2015).

291 To determine MSCs that are relevant in environmental settings it is thus crucial to test for  
292 selection in a complex community context, rather than in single strain systems.  
293 Understanding under which concentrations selection for and thus long-term fixation of newly  
294 acquired resistance mechanisms is occurring is crucial for future mitigation of the spread of  
295 resistance genes as well as their potentially pathogenic hosts (Larsson et al., 2018; Smalla  
296 et al., 2018). Our results further stress the need to preferentially use narrow spectrum  
297 antibiotics in clinical therapy to maintain a healthy microbiome within the patient that can  
298 more easily recover after antibiotic administration (Palleja et al., 2018), thus decreasing the  
299 likelihood of positive selection for pathogens that might have acquired resistance when  
300 embedded in a community.

301

## 302 **Material and Methods**

### 303 **Pig faecal community**

304 Pig faeces were collected from four Cornish Black pigs without previous exposure to  
305 antibiotics in April 2016 on Healey's Cornish Cyder farm (Penhallow, Cornwall, United  
306 Kingdom). Two hundred grams of faeces from each pig were pooled, mixed with 400ml each  
307 of sterile glycerol and 1.8 g/L NaCl solution. The mixture was homogenized for 3 min in a  
308 Retsch Knife mill Gm300 (Retsch GmbH, Haan, Germany) at 2000 rotations per minute  
309 (rpm), filtered through a sieve (mesh size  $\sim 1\text{mm}^2$ ), centrifuged at 500 rpm for 60 s at 4°C  
310 and the liquid supernatant fraction was collected and frozen at -80°C as the inoculum.

311

### 312 **Pig fecal extract**

313 Two hundred grams of faeces from each pig were pooled, mixed with 800 mL of sterile 0.9  
314 g/L NaCl solution. The mixture was homogenized for 3 minutes in a Retsch Knife mill Gm300  
315 (Retsch GmbH, Haan, Germany), at 2000 rotations per minute, filtered through a sieve  
316 (mesh size  $\sim 1\text{mm}^2$ ) and the liquid fraction was collected. The extract was then centrifuged  
317 (3500 rpm, 20 minutes, 4°C), the supernatant collected and autoclaved (121°C, 20 min). The  
318 autoclaved extract was centrifuged again (3500 rpm, 20 minutes, 4°C) and the supernatant  
319 collected and used as a nutrient supplement.

320

### 321 **Strains**

322 The focal species, *E. coli* MG1655, was chromosomally tagged with a TN7 gene cassette  
323 encoding constitutive red fluorescence, expressed by the *mCherry* gene (Remus-  
324 Emsermann et al., 2016) to ensure that *E. coli* can be detection and distinguished from other  
325 community members after competition based on red fluorescence. The kanamycin resistant,  
326 red fluorescent variant containing resistance gene *aph(3')-IIb* encoding an aminoglycoside  
327 3'-phosphotransferase was created previously (Klümper et al., 2015, 2014).

328 To create the gentamicin resistant mutant the strain was further tagged through  
329 electroporation with the pBAM delivery plasmid containing the mini-TN5 delivery system  
330 (Martinez-Garcia et al., 2014; Martínez-García et al., 2011) for gentamicin resistance gene  
331 *aacC1* encoding a gentamicin 3'-N-acetyltransferase (Kovach et al., 1995). Successful  
332 clones were screened for gentamicin resistance (30 µg/mL) and for the chosen clone a  
333 single strain growth curve in LB medium was measured to ensure that the cost of the  
334 resistance gene was lower than 10% compared to the susceptible strain to ensure  
335 competitive ability.

336

### 337 **Competition experiments**

338 Competition experiments as well as initial growth of focal species strains were performed in  
339 25 mL serum flasks with butyl rubber stoppers. As growth medium 10mL of sterile Luria  
340 Bertani broth supplemented with 0.1% pig faecal extract, 50 mg/L Cysteine-HCl as an  
341 oxygen scrubber and 1 mg/L Resazurin as a redox indicator to ensure anaerobic conditions  
342 (Großkopf et al., 2016), was added to each reactor, heated in a water bath to 80°C and  
343 bubbled with 100% N<sub>2</sub> gas until the oxygen indicator Resazurin turned colourless. After  
344 cooling down to 37°C the appropriate concentration of antibiotic (AB) was added from a  
345 1000x anaerobic stock solution.

346 Two isogenic pairs of the focal species, the susceptible, red fluorescent *E. coli* strain with  
347 either its gentamicin or kanamycin resistant counterpart, were competed across a gradient of  
348 six antibiotic concentrations (Gentamicin [µg/mL]: 0, 0.01, 0.1, 1, 10, 100; Kanamycin  
349 [µg/mL]: 0, 0.02, 0.2, 2, 20, 200). Strains as well as the community (100 µL of frozen stock)  
350 were grown separately under anaerobic conditions in triplicate reactors, replicates were  
351 combined, harvested through centrifugation, washed twice in 0.9% anaerobic NaCl solution  
352 and finally resuspended in 0.9% NaCl solution, adjusted to OD<sub>600</sub> 0.1 (~10<sup>7</sup> bacteria/mL) and  
353 subsequently used in competition experiments. Isogenic strains were mixed at 1:1 ratio (no  
354 community treatment), and that mix further added at 10% ratio to 90% of the faecal  
355 community (community treatment). Approximately 10<sup>6</sup> bacteria of either mix were transferred



356 to 6 replicate reactors of each of the antibiotic concentrations and grown at 37°C with 120  
357 rpm shaking for 24h which allowed growth up to carrying capacity. 100µL of each reactor  
358 were then transferred to a fresh bioreactor, grown for 24h, transferred for a final growth cycle  
359 and finally harvested for subsequent analysis.

360

### 361 **Fitness assay**

362 From each reactor after 3 days ( $T_3$ ), as well as the inocula ( $T_0$ ), a dilution series in sterile  
363 0.9% NaCl solution was prepared and plated on LB and LB+AB (30 µg/mL Gm or 75 µg/mL  
364 Kn). For appropriate dilutions total and resistant red fluorescent *E. coli* colonies were  
365 counted under the fluorescence microscope. Plating of the susceptible strain on LB+AB  
366 plates further did not lead to any growth of spontaneous mutants. The relative Fitness ( $\rho$ ) of  
367 the resistant (r) compared to the susceptible strain (s) strain was subsequently calculated  
368 based on their individual growth rate ( $\gamma$ ) throughout the competition experiment:

$$\rho = \frac{\gamma_r}{\gamma_s} = \frac{\log(10^6 \times n_r^{T_3}/n_r^{T_0})}{\log(10^6 \times n_s^{T_3}/n_s^{T_0})} = \frac{\log(10^6 \times n_r^{T_3}/n_r^{T_0})}{\log(10^6 \times (n_{total}^{T_3} - n_r^{T_3})/(n_{total}^{T_0} - n_r^{T_0}))}$$

369 Statistical significant testing (n=6) was performed using a one-tailed t-test against neutral  
370 selection ( $\rho=1$ ) and ANOVA corrected for multiple testing to compare the relative fitness of  
371 different samples.

372

### 373 **DNA extraction & sequencing**

374 Bacteria from each reactor, as well as inoculum and original pig faecal community were  
375 harvested through centrifugation of 2 mL of liquid, followed by DNA extraction using the  
376 Qiagen PowerSoil kit as per the manufacturer's instructions. The quality and quantity of the  
377 extractions was confirmed by 1% agarose gel electrophoresis and dsDNA BR (Qubit)  
378 respectively.

379 16S rRNA gene libraries were constructed using multiplex primers designed to amplify the  
380 V4 region (Kozich et al., 2013). Amplicons were generated using a high-fidelity polymerase  
381 (Kapa 2G Robust), purified with the Agencourt AMPure XP PCR purification system and

382 quantified using a fluorometer (Qubit, Life Technologies, Carlsbad, CA, USA). The purified  
383 amplicons were pooled in equimolar concentrations based on Qubit quantification. The  
384 resulting amplicon library pool was diluted to 2 nM with sodium hydroxide and 5 mL were  
385 transferred into 995mL HT1 (Illumina) to give a final concentration of 10 pM. 600 mL of the  
386 diluted library pool was spiked with 10% PhiXControl v3 and placed on ice before loading  
387 into Illumina MiSeq cartridge following the manufacturer's instructions. The sequencing  
388 chemistry utilized was MiSeq Reagent Kit v2 (500 cycles) with run metrics of 250 cycles for  
389 each paired end read using MiSeq Control Software 2.2.0 and RTA 1.17.28.

390 Metagenomic libraries were created using the KAPA high throughout Library Prep Kit (Part  
391 No: KK8234) optimized for 1ug of input DNA with a size selection and performed with  
392 Beckman Coulter XP beads (Part No: A63880). Samples were sheared with a Covaris S2  
393 sonicator (available from Covaris and Life Technologies) to a size of 350bp. The ends of the  
394 samples were repaired, the 3' to 5' exonuclease activity removed the 3' overhangs and the  
395 polymerase activity filled in the 5' overhangs creating blunt ends. A single 'A' nucleotide was  
396 added to the 3' ends of the blunt fragments to prevent them from ligating to one another  
397 during the adapter ligation reaction. A corresponding single 'T' nucleotide on the 3' end of  
398 the adapter provided a complementary overhang for ligating the adapter to the fragment  
399 ensuring a low rate of chimera formation. Indexing adapters were ligated to the ends of the  
400 DNA fragments for hybridisation on a flow cell. The ligated product underwent size selection  
401 using the XP beads detailed above, thus removing the majority of un-ligated or hybridized  
402 adapters. Prior to hybridisation the samples underwent 6 cycles of PCR to selectively enrich  
403 those DNA fragments with adapter molecules on both ends and to amplify the amount of  
404 DNA in the library. The PCR was performed with a PCR primer cocktail that anneals to the  
405 ends of the adapter. The insert size of the libraries was verified by running an aliquot of the  
406 DNA library on a PerkinElmer GX using the High Sensitivity DNA chip (Part No: 5067-4626)  
407 and the concentration was determined by using a High Sensitivity Qubit assay. All raw  
408 sequencing data has been submitted to ENA under study accession number PRJEB29924.

409

## 410 **16S Analysis**

411 Sequence analysis was carried out using mothur v.1.32.1 (Schloss et al., 2009) and the  
412 MiSeq SOP (Kozich et al., 2013) as accessed on 07.08.2017 on  
413 [http://www.mothur.org/wiki/MiSeq\\_SOP](http://www.mothur.org/wiki/MiSeq_SOP). Sequences were classified based on the RDP  
414 classifier (Wang et al., 2007). Diversity was assessed based on observed OTUs at 97%  
415 sequence similarity. NMDS plots for the community were created after removing all  
416 sequences of the focal species *E. coli* based on the Bray-Curtis dissimilarity metric (Bray  
417 and Curtis, 1957). Further sample similarity was tested using analysis of molecular variance  
418 (AMOVA) a nonparametric analogue of traditional ANOVA testing. AMOVA is commonly  
419 used in population genetics to test the hypothesis that genetic diversity between two or more  
420 populations is not significantly different from a community created from stochastically pooling  
421 these populations (Anderson, 2001; Gravina and Vijg, 2010).

422

## 423 **Metagenomic analysis**

424 Metagenomic samples, as well as a reference genome for the focal species *E. coli* MG1655,  
425 were analysed using the ARG-OAP pipeline for antibiotic resistance genes detection from  
426 metagenomic data using an integrated structured antibiotic resistance gene database (Yang  
427 et al., 2016). This resulted in the abundance of different resistance gene classes and  
428 subtypes within these groups normalized by 16S rRNA copy number. Antibiotic resistance  
429 genes detected in the *E. coli* reference genome were subtracted from the total number of  
430 hits per 16S copy based on the abundance of *E. coli* 16S/total 16S. Further, all antibiotic  
431 resistance gene numbers were normalized to the amount of pig faecal community 16S per  
432 total 16S copy.

433

## 434 **Antibiotic inhibition testing**

435 To test if any degradation of antibiotics occurred in any of the reactors, 500µL of filter  
436 sterilized (0.22 µm<sup>2</sup> pore size) supernatant of each reactor were applied to a 6mm Grade AA  
437 paper disk (Whatman, Maidstone, UK), and a paper disk-agar diffusion assay (Raahave,

438 1974) was performed on LB medium supplemented with 1% of an overnight culture of the  
439 susceptible strain. After 24h incubation at 37°C images of the halo zones were taken using a  
440 Leica S8APO stereomicroscope (Leica, Wetzlar, Germany). The area of halo zones was  
441 determined by image analysis in Inkscape (version 0.91, <http://www.inkscape.org/>). Three  
442 technical replicate disks for each of the six replicate reactors were averaged, for a total of 18  
443 measurements per concentration.

444

#### 445 **Mathematical model**

446 In order to illustrate possible mechanisms underlying the data for bacterial fitness in the  
447 presence / absence of the community for varying concentrations of gentamicin and  
448 kanamycin, we described our experimental setup mathematically. For this we first developed  
449 a discrete-time mathematical model for the growth of the susceptible and drug-resistant  
450 bacteria,  $s$  and  $r$ , respectively, in the presence or absence of the community,  $c$ .

451

#### 452 Bacterial growth

453 The discrete-time model describing the growth of the bacteria  $i$ ,  $i=s,r,c$ , is governed by the  
454 following iterative model

$$n_i^{t+1} = n_i^t (1 + \phi_i (1 - g_i) (1 - f_i)),$$

455 where  $n_i^{t+1}$  is the size of the population of strain  $i$  at time  $t+1$ , and  $\phi_i$  is the maximum growth  
456 rate in the absence of competition and drug pressure. The reduction in growth due to  
457 density-dependent regulation / resource limitation, given as

$$g_i = \frac{\sum_j e_{ij} n_j}{k_d},$$

458 with  $k_d$  as the carrying capacity and  $e_{ij}$  being the competition coefficient, describing how  
459 much the presence of an allospecific strain  $j$  impacts the competitive fitness of strain  $i$ . The

460 reduction in bacterial growth due to drug pressure,  $f_i$ , is governed by a generalised logistic  
461 function

$$f_i = \min\left(f_{\max}, \frac{1}{1 + e^{\alpha_i - \beta_i \ln c}}\right)$$

462 where  $c$  is the drug concentration (in  $\mu\text{g/mL}$ ),  $\alpha_i$  and  $\beta_i$  are the parameters describing the  
463 dose-response relationship for strain  $i$ , and  $f_{\max} = 0.9$  is the maximum growth inhibition.

464

465

#### 466 Model simulation and relative fitness calculation

467 Starting from an initially small number of bacteria in fresh medium, we ran the model for 30  
468 generations, at which point the bacterial population had reached carrying capacity, and  
469 diluted the population accordingly. The bacteria were again allowed to grow for 30  
470 generations before being diluted and grown for a final 30 generations. At this point we  
471 calculated the relative fitness of the resistant strain as

$$\rho = \frac{\gamma_r}{\gamma_s} = \frac{\log(10^6 \times n_r^{90} / n_r^0)}{\log(10^6 \times n_s^{90} / n_s^0)}$$

472

#### 473 Community-dependent change in drug resistance / susceptibility

474 The kanamycin data seem to suggest that the benefit of the drug resistant bacteria is  
475 reduced in the presence of the community at medium to high drug concentrations pointing  
476 towards a decrease in the susceptibility of the susceptible strain in a community context. We  
477 captured this scenario by making the dose-response parameters  $\alpha_{s,r}$  and  $\beta_{s,r}$  explicitly  
478 dependent on the density of the community by increasing the resistance of susceptible  
479 strain,  $s$ , i.e.

480

481 
$$\alpha_s(t) = \alpha_{s,0} \left( 1 + \frac{1.3 n_c^t}{n_c^t + 10^3} \right),$$

$$\beta_s(t) = \beta_{s,0} \left( 1 + \frac{0.35 n_c^t}{n_c^t + 10^3} \right),$$

482 where  $\alpha_{i,0}$  and  $\beta_{i,0}$  are the time-independent dose-response parameters (Table 2). The effect  
483 of density dependence is further illustrated in Figure SI4.

484

### 485 **Parameter estimations**

486 For each drug (gentamicin and kanamycin) we obtained a set of parameter values that  
487 resulted in a good overall fit between the model simulations and the data, where the data  
488 comprised the observed relative fitness for both sets of experiments (i.e. bacteria grown in  
489 the presence and absence of the community) for six different drug concentrations. To allow  
490 for logarithmic regression the non-antibiotic control was assumed as one order of magnitude  
491 lower than the lowest concentration used in the experiment. The parameter values were  
492 determined by minimising the root-mean-square error using an optimisation algorithm akin to  
493 simulated annealing (Kirkpatrick et al., 1983). The aim here was not to perform rigorous  
494 parameter estimation but rather to find a set of parameters that, given specific model  
495 constraints and assumptions, resulted in model behaviours that qualitatively agreed with  
496 both the observed dynamics over the repeated growth cycles and the empirically determined  
497 fitness values. In fact, our method failed to find a unique set of values that consistently gave  
498 the best fitting model, which suggests that the available data was insufficient to determine  
499 the global maximum. However, the qualitative relationships between individual parameters  
500 and between the parameters comparing the two antimicrobials were fairly consistent  
501 between model runs. Tables 1 and 2 list the sets of parameters as used in Figures 1-2.

502

## 503 **Acknowledgments**

504 UK received funding from the European Union's Horizon 2020 research and innovation  
505 program under Marie Skłodowska-Curie grant agreement no. 751699. UK, AB and WG were  
506 supported through an MRC/BBSRC grant (MR/N007174/1). XY thanks The University of  
507 Hong Kong for a postgraduate studentship.

508

## 509 **Author contributions**

510 UK, LZ, AB and WG conceived the study and designed experiments; UK performed  
511 experimental work; MR performed mathematical modelling; UK, XY and TZ performed  
512 sequencing analysis; UK, AB, WG analysed data and wrote the manuscript.

513

## 514 **Competing interests**

515 The authors declare no competing interests.

516

## 517 **Materials & Correspondence**

518 All correspondence and material requests should be addressed to UK.

519

520

## 521 **References**

- 522 Anderson MJ. 2001. A new method for non-parametric multivariate analysis of variance.  
523 *Austral Ecol* **26**:32–46. doi:10.1111/j.1442-9993.2001.01070.pp.x
- 524 Andersson DI, Hughes D. 2011. Persistence of antibiotic resistance in bacterial populations.  
525 *FEMS Microbiol Rev* **35**:901–911. doi:10.1111/j.1574-6976.2011.00289.x
- 526 Andersson DI, Hughes D. 2010. Antibiotic resistance and its cost: is it possible to reverse  
527 resistance? *Nat Rev Microbiol* **8**:260–271. doi:10.1038/nrmicro2319
- 528 Arias-Andres M, Klümper U, Rojas-Jimenez K, Grossart HP. 2018. Microplastic pollution  
529 increases gene exchange in aquatic ecosystems. *Environ Pollut* **237**:253–261.  
530 doi:10.1016/j.envpol.2018.02.058
- 531 Bray JR, Curtis JT. 1957. An ordination of the upland forest communities of Southern  
532 Wisconsin. *Ecol Monogr* **27**:325–349. doi:10.2307/1942268
- 533 Cao J, Kürsten D, Schneider S, Knauer A, Günther PM, Köhler JM. 2012. Uncovering  
534 toxicological complexity by multi-dimensional screenings in microsegmented flow:  
535 Modulation of antibiotic interference by nanoparticles. *Lab Chip* **12**:474–484.  
536 doi:10.1039/c1lc20584f
- 537 Carlet J. 2012. The gut is the epicentre of antibiotic resistance. *Antimicrob Resist Infect*  
538 *Control* **1**:39. doi:10.1186/2047-2994-1-39
- 539 Churski K, Kaminski TS, Jakiela S, Kamysz W, Baranska-Rybak W, Weibel DB, Garstecki P.  
540 2012. Rapid screening of antibiotic toxicity in an automated microdroplet system. *Lab*  
541 *Chip* **12**:1629. doi:10.1039/c2lc21284f
- 542 D'Costa VM, King CE, Kalan L, Morar M, Sung WWL, Schwarz C, Froese D, Zazula G,  
543 Calmels F, Debruyne R, Golding GB, Poinar HN, Wright GD. 2011. Antibiotic resistance  
544 is ancient. *Nature* **477**:457–461. doi:10.1038/nature10388
- 545 Day T, Huijben S, Read AF. 2015. Is selection relevant in the evolutionary emergence of  
546 drug resistance? *Trends Microbiol* **23**:126–133. doi:10.1016/j.tim.2015.01.005
- 547 Drenkard E, Ausubel FM. 2002. Pseudomonas biofilm formation and antibiotic resistance are



- 548 linked to phenotypic variation. *Nature* **416**:740–743. doi:10.1038/416740a
- 549 Drlica K. 2003. The mutant selection window and antimicrobial resistance. *J Antimicrob*  
550 *Chemother* **52**:11–17. doi:10.1093/jac/dkg269
- 551 Drlica K, Zhao X. 2007. Mutant selection window hypothesis updated. *Clin Infect Dis*  
552 **44**:681–688. doi:10.1086/511642
- 553 Flach CF, Genheden M, Fick J, Joakim Larsson DG. 2018. A comprehensive screening of  
554 *Escherichia coli* isolates from Scandinavia’s largest sewage treatment plant indicates  
555 no selection for antibiotic resistance. *Environ Sci Technol* **52**:11419–11428.  
556 doi:10.1021/acs.est.8b03354
- 557 Gómez P, Buckling A. 2011. Bacteria-phage antagonistic coevolution in soil. *Science (80- )*  
558 **332**:106–109. doi:10.1126/science.1198767
- 559 Gravina S, Vijg J. 2010. Epigenetic factors in aging and longevity. *Pflugers Arch Eur J*  
560 *Physiol* **459**:247–258. doi:10.1007/s00424-009-0730-7
- 561 Großkopf T, Zenobi S, Alston M, Folkes L, Swarbreck D, Soyer OS. 2016. A stable genetic  
562 polymorphism underpinning microbial syntrophy. *ISME J* **10**:2844–2853.  
563 doi:10.1038/ismej.2016.80
- 564 Gullberg E, Albrecht LM, Karlsson C, Sandegren L, Andersson DI. 2014. Selection of a  
565 multidrug resistance plasmid by sublethal levels of antibiotics and heavy metals. *MBio*  
566 **5**:e01918-14-e01918-14. doi:10.1128/mBio.01918-14
- 567 Gullberg E, Cao S, Berg OG, Ilbäck C, Sandegren L, Hughes D, Andersson DI. 2011.  
568 Selection of resistant bacteria at very low antibiotic concentrations. *PLoS Pathog*  
569 **7**:e1002158. doi:10.1371/journal.ppat.1002158
- 570 Kirkpatrick S, Gelatt CD, Vecchi MP. 1983. Optimization by simulated annealing. *Science*  
571 *(80- )* **220**:671–680. doi:10.1126/science.220.4598.671
- 572 Klümper U, Dechesne A, Riber L, Brandt KK, Gülay A, Sørensen SJ, Smets BF. 2017. Metal  
573 stressors consistently modulate bacterial conjugal plasmid uptake potential in a  
574 phylogenetically conserved manner. *ISME J* **11**:152–165. doi:10.1038/ismej.2016.98
- 575 Klümper U, Dechesne A, Smets BF. 2014. Protocol for evaluating the permissiveness of

576 bacterial communities toward conjugal plasmids by quantification and isolation of  
577 transconjugants. *Hydrocarbon and Lipid Microbiology Protocols*, Springer Protocols  
578 Handbook. Humana Press. pp. 275–288. doi:10.1007/8623\_2014\_36

579 Klümper U, Riber L, Dechesne A, Sannazzarro A, Hansen LH, Sørensen SJ, Smets BF.  
580 2015. Broad host range plasmids can invade an unexpectedly diverse fraction of a soil  
581 bacterial community. *ISME J* **9**:934–945. doi:10.1038/ismej.2014.191

582 Knapp CW, Doling J, Ehlert PAI, Graham DW. 2010. Evidence of increasing antibiotic  
583 resistance gene abundances in archived soils since 1940. *Environ Sci Technol* **44**:580–  
584 587. doi:10.1021/es901221x

585 Kovach ME, Elzer PH, Steven Hill D, Robertson GT, Farris MA, Roop RM, Peterson KM.  
586 1995. Four new derivatives of the broad-host-range cloning vector pBBR1MCS,  
587 carrying different antibiotic-resistance cassettes. *Gene* **166**:175–176. doi:10.1016/0378-  
588 1119(95)00584-1

589 Kozich JJ, Westcott SL, Baxter NT, Highlander SK, Schloss PD. 2013. Development of a  
590 dual-index sequencing strategy and curation pipeline for analyzing amplicon sequence  
591 data on the MiSeq Illumina sequencing platform. *Appl Environ Microbiol* **79**:5112–20.  
592 doi:10.1128/AEM.01043-13

593 Kraaijeveld AR, Limentani EC, Godfray HCJ. 2001. Basis of the trade-off between parasitoid  
594 resistance and larval competitive ability in *Drosophila melanogaster*. *Proc R Soc B Biol*  
595 *Sci* **268**:259–261. doi:10.1098/rspb.2000.1354

596 Kümmerer K. 2009. Antibiotics in the aquatic environment – A review – Part II.  
597 *Chemosphere* **75**:435–441. doi:10.1016/J.CHEMOSPHERE.2008.12.006

598 Larsson DGJ, Andremon A, Bengtsson-Palme J, Brandt KK, de Roda Husman AM,  
599 Fagerstedt P, Fick J, Flach C-FF, Gaze WH, Kuroda M, Kvint K, Laxminarayan R,  
600 Manaia CM, Nielsen KM, Plant L, Ploy M-CC, Segovia C, Simonet P, Smalla K, Snape  
601 J, Topp E, van Hengel AJ, Verner-Jeffreys DW, Virta MPJ, Wellington EM, Wernersson  
602 A-SS. 2018. Critical knowledge gaps and research needs related to the environmental  
603 dimensions of antibiotic resistance. *Environ Int* **117**:132–138.

- 604 doi:10.1016/j.envint.2018.04.041
- 605 Liu A, Fong A, Becket E, Yuan J, Tamae C, Medrano L, Maiz M, Wahba C, Lee C, Lee K,  
606 Tran KP, Yang H, Hoffman RM, Salih A, Miller JH. 2011. Selective advantage of  
607 resistant strains at trace levels of antibiotics: a simple and ultrasensitive color test for  
608 detection of antibiotics and genotoxic agents. *Antimicrob Agents Chemother* **55**:1204–  
609 1210. doi:10.1128/AAC.01182-10
- 610 Lundström S V., Östman M, Bengtsson-Palme J, Rutgersson C, Thoudal M, Sircar T, Blanck  
611 H, Eriksson KM, Tysklind M, Flach C-F, Larsson DGJ. 2016. Minimal selective  
612 concentrations of tetracycline in complex aquatic bacterial biofilms. *Sci Total Environ*  
613 **553**:587–595. doi:10.1016/j.scitotenv.2016.02.103
- 614 Mah TF, Pitts B, Pellock B, Walker GC, Stewart PS, O'Toole GA. 2003. A genetic basis for  
615 *Pseudomonas aeruginosa* biofilm antibiotic resistance. *Nature* **426**:306–310.  
616 doi:10.1038/nature02122
- 617 Marti-nez-Garci-a E, Aparicio T, de Lorenzo V, Nikel PI. 2014. New Transposon Tools  
618 Tailored for Metabolic Engineering of Gram-Negative Microbial Cell Factories. *Front*  
619 *Bioeng Biotechnol* **2**:46. doi:10.3389/fbioe.2014.00046
- 620 Martínez-García E, Calles B, Arévalo-Rodríguez M, De Lorenzo V. 2011. PBAM1: An all-  
621 synthetic genetic tool for analysis and construction of complex bacterial phenotypes.  
622 *BMC Microbiol* **11**:38. doi:10.1186/1471-2180-11-38
- 623 Medaney F, Dimitriu T, Ellis RJ, Raymond B. 2016. Live to cheat another day: Bacterial  
624 dormancy facilitates the social exploitation of  $\beta$ -lactamases. *ISME J* **10**:778–787.  
625 doi:10.1038/ismej.2015.154
- 626 Murray AK, Zhang L, Yin X, Zhang T, Buckling A, Snape J, Gaze WH. 2018. Novel insights  
627 into selection for antibiotic resistance in complex microbial communities. *MBio*  
628 **9**:e00969-18. doi:10.1128/mBio.00969-18
- 629 Musovic S, Klümper U, Dechesne A, Magid J, Smets BF. 2014. Long-term manure exposure  
630 increases soil bacterial community potential for plasmid uptake. *Environ Microbiol Rep*  
631 **6**:125–130. doi:10.1111/1758-2229.12138

- 632 Norman A, Hansen LH, Sørensen SJ. 2009. Conjugative plasmids: vessels of the communal  
633 gene pool. *Philos Trans R Soc Lond B Biol Sci* **364**:2275–2289.  
634 doi:10.1098/rstb.2009.0037
- 635 Palleja A, Mikkelsen KH, Forslund SK, Kashani A, Allin KH, Nielsen T, Hansen TH, Liang S,  
636 Feng Q, Zhang C, Pyl PT, Coelho LP, Yang H, Wang J, Typas A, Nielsen MF, Nielsen  
637 HB, Bork P, Wang J, Vilsbøll T, Hansen T, Knop FK, Arumugam M, Pedersen O. 2018.  
638 Recovery of gut microbiota of healthy adults following antibiotic exposure. *Nat Microbiol*  
639 **3**:1255–1265. doi:10.1038/s41564-018-0257-9
- 640 Perron GG, Gonzalez A, Buckling A. 2007. Source-sink dynamics shape the evolution of  
641 antibiotic resistance and its pleiotropic fitness cost. *Proc R Soc B Biol Sci* **274**:2351–  
642 2356. doi:10.1098/rspb.2007.0640
- 643 Raahave D. 1974. Paper disk-agar diffusion assay of penicillin in the presence of  
644 streptomycin. *Antimicrob Agents Chemother* **6**:603–605. doi:10.1128/AAC.6.5.603
- 645 Remus-Emsermann MNP, Gisler P, Drissner D. 2016. MiniTn7-transposon delivery vectors  
646 for inducible or constitutive fluorescent protein expression in Enterobacteriaceae. *FEMS*  
647 *Microbiol Lett* **363**:fnw178. doi:10.1093/femsle/fnw178
- 648 Schloss PD, Westcott SL, Ryabin T, Hall JR, Hartmann M, Hollister EB, Lesniewski R a.,  
649 Oakley BB, Parks DH, Robinson CJ, Sahl JW, Stres B, Thallinger GG, Van Horn DJ,  
650 Weber CF. 2009. Introducing mothur: Open-source, platform-independent, community-  
651 supported software for describing and comparing microbial communities. *Appl Environ*  
652 *Microbiol* **75**:7537–7541. doi:10.1128/AEM.01541-09
- 653 Shintani M, Matsui K, Inoue JI, Hosoyama A, Ohji S, Yamazoe A, Nojiri H, Kimbara K,  
654 Ohkuma M. 2014. Single-cell analyses revealed transfer ranges of incP-1, incP-7, and  
655 incP-9 plasmids in a soil bacterial community. *Appl Environ Microbiol* **80**:138–145.  
656 doi:10.1128/AEM.02571-13
- 657 Smalla K, Cook K, Djordjevic SP, Klümper U, Gillings M. 2018. Environmental dimensions of  
658 antibiotic resistance: Assessment of basic science gaps. *FEMS Microbiol Ecol*.  
659 doi:10.1093/femsec/fiy195

- 660 Song T, Park Y, Shamputa IC, Seo S, Lee SY, Jeon HS, Choi H, Lee M, Glynn RJ, Barnes  
661 SW, Walker JR, Batalov S, Yusim K, Feng S, Tung CS, Theiler J, Via LE, Boshoff HIM,  
662 Murakami KS, Korber B, Barry CE, Cho SN. 2014. Fitness costs of rifampicin  
663 resistance in *Mycobacterium tuberculosis* are amplified under conditions of nutrient  
664 starvation and compensated by mutation in the  $\beta'$  subunit of RNA polymerase. *Mol*  
665 *Microbiol* **91**:1106–1119. doi:10.1111/mmi.12520
- 666 Sorg RA, Lin L, van Doorn GS, Sorg M, Olson J, Nizet V, Veening JW. 2016. Collective  
667 resistance in microbial communities by intracellular antibiotic deactivation. *PLoS Biol*  
668 **14**:e2000631. doi:10.1371/journal.pbio.2000631
- 669 Tenaille O, Skurnik D, Picard B, Denamur E. 2010. The population genetics of commensal  
670 *Escherichia coli*. *Nat Rev Microbiol* **8**:207–217. doi:10.1038/nrmicro2298
- 671 Wale N, Sim DG, Jones MJ, Salathe R, Day T, Read AF. 2017. Resource limitation prevents  
672 the emergence of drug resistance by intensifying within-host competition. *Proc Natl*  
673 *Acad Sci* **114**:201715874. doi:10.1073/pnas.1715874115
- 674 Wang Q, Garrity GM, Tiedje JM, Cole JR. 2007. Naïve Bayesian classifier for rapid  
675 assignment of rRNA sequences into the new bacterial taxonomy. *Appl Environ*  
676 *Microbiol* **73**:5261–5267. doi:10.1128/AEM.00062-07
- 677 WHO. 2014. Antimicrobial Resistance Global Report on Surveillance.
- 678 Yang Y, Jiang X, Chai B, Ma L, Li B, Zhang A, Cole JR, Tiedje JM, Zhang T. 2016. ARGs-  
679 OAP: Online analysis pipeline for antibiotic resistance genes detection from  
680 metagenomic data using an integrated structured ARG-database. *Bioinformatics*  
681 **32**:2346–2351. doi:10.1093/bioinformatics/btw136
- 682 Yurtsev EA, Chao HX, Datta MS, Artemova T, Gore J. 2013. Bacterial cheating drives the  
683 population dynamics of cooperative antibiotic resistance plasmids. *Mol Syst Biol* **9**:683.  
684 doi:10.1038/msb.2013.39
- 685
